# Supplementary material for: Thermodynamic insights into interfacial interactions in TiN/amorphous Al2O3 heterostructures: ab initio molecular dynamics and first principles investigation
Source: Royal Society of Chemistry journal article supplement (doi:10.1039/d0qi00839g), 2020-01-01
Supplement: d0qi00839g1.pdf [file d0qi00839g1.pdf]

## Electronic Supplementary Information

# Thermodynamic insights from interfacial interactions in TiN/amorphous Al<sub>2</sub>O<sub>3</sub> heterostructures: Ab initio molecular dynamics and first principles investigation

Hwanyeol Park,<sup>1,2</sup> Dong-Hoon Han<sup>3</sup>, Hong Taek Lim<sup>3</sup>, Euijoon Yoon<sup>\*,1,4</sup> and Gun-Do Lee<sup>\*,1,4</sup>

<sup>1</sup>Department of Materials Science and Engineering, Seoul National University, Seoul 08826, Korea

<sup>2</sup>Memory Thin Film Technology Team, Giheung Hwaseong Complex, Samsung Electronics, 445-701, South Korea

<sup>3</sup>Memory Metal Technology Team, Giheung Hwaseong Complex, Samsung Electronics, 445-701, South Korea

<sup>4</sup>Research Institute of Advanced Materials and Inter-university Semiconductor Research Center, Seoul National University, Seoul 08826, South Korea

Corresponding authors: eyoon@snu.ac.kr; [gdlee@snu.ac.kr](mailto:gdlee@snu.ac.kr)

This supporting information explains the detailed methodology used to compute the elastic constants of amorphous films.

### 1. Preparation of the am-Al<sub>2</sub>O<sub>3</sub> Substrate.

To properly accommodate an anisotropic cubic and isotropic amorphous TiN films on am-Al<sub>2</sub>O<sub>3</sub> substrate, we constructed am-Al<sub>2</sub>O<sub>3</sub> structures that are sufficiently large and similar in magnitude. The a and b directions are required to be long enough because there should exist enough space above the substrate for a representative film to be inserted. As artificial correlations over the periodic boundaries vanish within approximately 8.5 to 12 Å for all interfaces, we found that am-Al<sub>2</sub>O<sub>3</sub> slab configurations with a = 11.793 Å for am-TiN (80-atoms), a = 8.518 Å for cubic-TiN(001) (46-atoms), a = 12.046 Å, b = 12.777 Å for cubic-TiN(011) (144-atoms), and a = 12.046 Å, b = 10.432 Å for cubic-TiN(111) (69-atoms), respectively, are sufficiently large to accommodate a representative TiN films above. In the z direction, the substrate is composed of a thickness of 11.793 Å. The height of the simulation cell in the z direction is fixed at 35 Å, providing a large vacuum of at least 18 Å when amorphous or crystalline films are inserted above the am-Al<sub>2</sub>O<sub>3</sub> substrate.

AIMD simulations are carried out to obtain the am-Al<sub>2</sub>O<sub>3</sub> structures. The cubic supercell with the density of 3.4 g/cm<sup>3</sup> was used, which is well matched to the value of the density (3.05 ~ 3.4 g/cm<sup>3</sup>) for the amorphous Al<sub>2</sub>O<sub>3</sub> in experiments.<sup>1,2</sup> As the a and b dimensions match the subsequent TiN films, this process ensures that any subsequent TiN film derived from the liquid does not develop artificial strains when transferring all TiN films onto the substrate. MD simulation was performed in the NVT ensemble for the liquid corresponding to the amorphous film considered (80 atoms) at 4000 K for 5000 MD steps, with a 1 fs time step. In the second (production) stage, the liquid is simulated for an additional 5000 MD steps.

## 2. Preparation of Amorphous TiN Film/am-Al<sub>2</sub>O<sub>3</sub> Substrate Configurations.

For the amorphous TiN films, we start by creating a TiN liquid using AIMD in a cubic box. MD simulation is run in the NVT ensemble for the liquid amorphous film considered (96 atoms) at 4000 K for 5000 MD steps, with 1 fs time step. In the second (production) stage, the surface structure is simulated for an additional 5000 MD steps. These selected configurations are then transferred on to the am-Al<sub>2</sub>O<sub>3</sub> slab, utilizing their existing atomic arrangements near the boundaries of their initial simulation box as the new film/substrate system. This procedure is equivalent to cleaving the configurations of bulk amorphous structure at a random position to create an interface with TiN surface and am-Al<sub>2</sub>O<sub>3</sub> surface. At the end of this MD optimization, structural optimization using higher precision DFT-based conjugate-gradient is carried out to acquire the final energies of the supercells. Thinner films are created by removing stoichiometric portions of TiN from the top of the films and repeating the AIMD + DFT optimization routine as described above. For each film thickness, the configuration yielding the lowest energy is selected for further comparisons of stability.

## 3. Preparation of Cubic TiN Film/ am-Al<sub>2</sub>O<sub>3</sub> Substrate Configurations.

TiN(001), TiN(011) and TiN(111) surfaces with B1-NaCl structure are used as the subsequent surfaces. The optimized lattice parameter of TiN is  $a_0 = 4.21 \text{ \AA}$ , which is in good agreement with the experimental value ( $a_0 = 4.24 \text{ \AA}$ ).<sup>3</sup> For the TiN(001) surface, a slab of (2 x 2) supercell was considered. For comparison, the TiN(011) and TiN(111) surfaces were considered with a slab of (2 x 2) and (2 x 3) supercells, respectively.

## 4. Calculation of stability of each hetero-structure model.

For investigating the stability of each hetero-structure model, the interface formation energy was computed by the following formula:

$$E_{int} = -(E(TiN) + E(Al_2O_3) - E(TiN/Al_2O_3))/S$$

$E(TiN)$ ,  $E(Al_2O_3)$ , and  $E(TiN/Al_2O_3)$  represent the total energies of the unrelaxed TiN slab, Al<sub>2</sub>O<sub>3</sub> slab, and TiN/Al<sub>2</sub>O<sub>3</sub> hetero-structure, respectively; and  $S$  is the area of the interface.

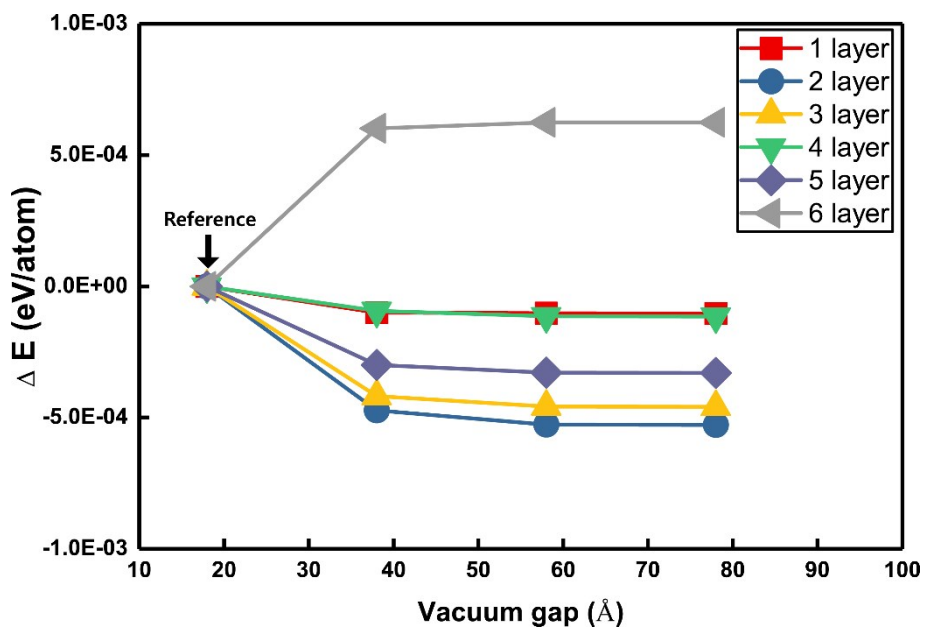

**Figure S1.** The energy difference between changed energy value (78 Å vacuum gap) and reference value (18 Å vacuum gap) for all TiN(111) layers on am-Al<sub>2</sub>O<sub>3</sub> (OH-terminated).

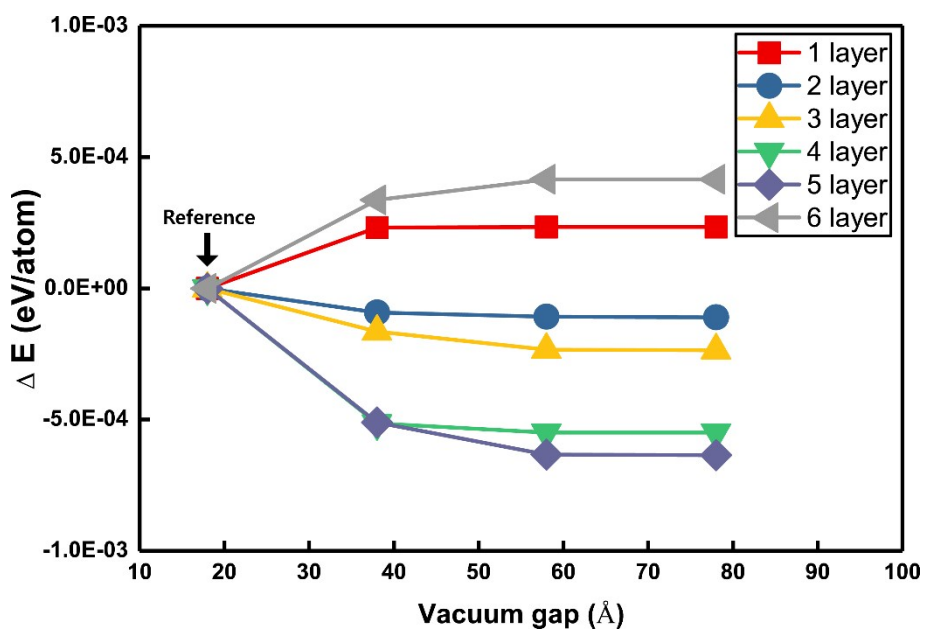

**Figure S2.** The energy difference between changed energy value (78 Å vacuum gap) and reference value (18 Å vacuum gap) for all TiN(111) layers on am-Al<sub>2</sub>O<sub>3</sub> (O-terminated).

## References

1. S.M. Lee, D.G. Cahill, T.H. Allen, Thermal conductivity of sputtered oxide films, *Physical Review B*, 52 (1995) 253-257.
2. J.M. Chirgwin, A.E. Przybyla, R.J. MacDonald, W.J. Rutter, Isolation of biologically active ribonucleic acid from sources enriched in ribonuclease, *Biochemistry*, 18 (1979) 5294-5299.
3. N. Schonberg, An X-Ray Investigation on Ternary Phases in the Ta-Ti-N, Ta-Cr-N, Ta-Mn-N, Ta-Fe-N, Ta-Co-N, Ta-Ni-N Systems, *Acta Chemica Scandinavica*, 8 (1954) 213-220.
